# Supplementary material for: Insitu coating of nitrogen-doped graphene-like nanosheets on silicon as a stable anode for high-performance lithium-ion batteries
Source: Royal Society of Chemistry journal article supplement (doi:10.1039/c4ta01876a), 2014-01-01
Supplement: c4ta01876a1.pdf [file c4ta01876a1.pdf]

## SUPPLEMENTARY INFORMATION

### In situ coating of nitrogen-doped graphene-like nanosheets on silicon as stable anode for high-performance lithium-ion battery

Hongwei Mi,<sup>a,b</sup> Yongliang Li,<sup>a</sup> Peiyang Zhu,<sup>a</sup> Xiaoyan Chai,<sup>a</sup> Lingna Sun,<sup>a</sup> Haitao Zhuo,<sup>a</sup> Qianling Zhang,<sup>a</sup> Chuanxin He,<sup>\*a</sup> Jianhong Liu<sup>\*a,b</sup>

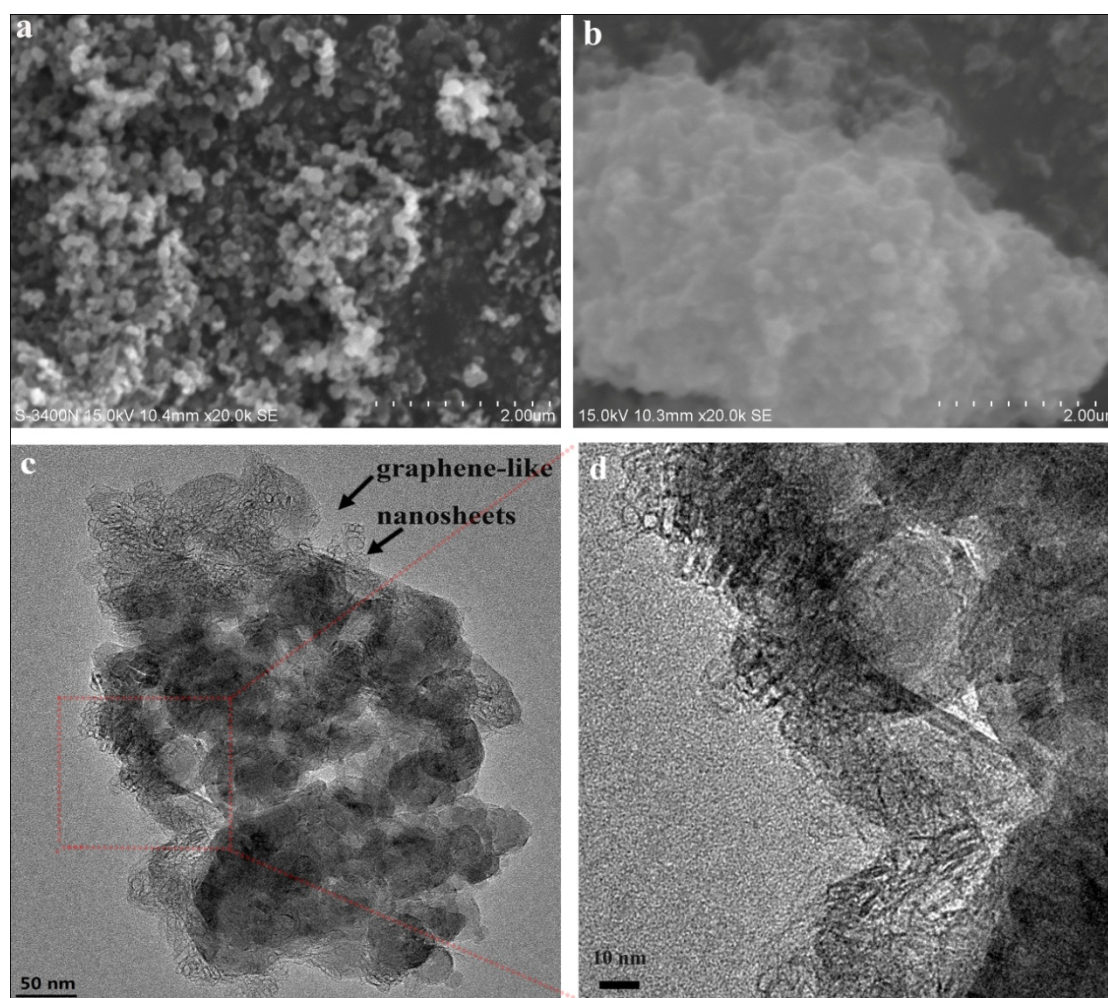

**Fig. S1** SEM images of (a) Si, (b) G-29% Si composite and TEM images of (c),(d) G-29% Si composite.

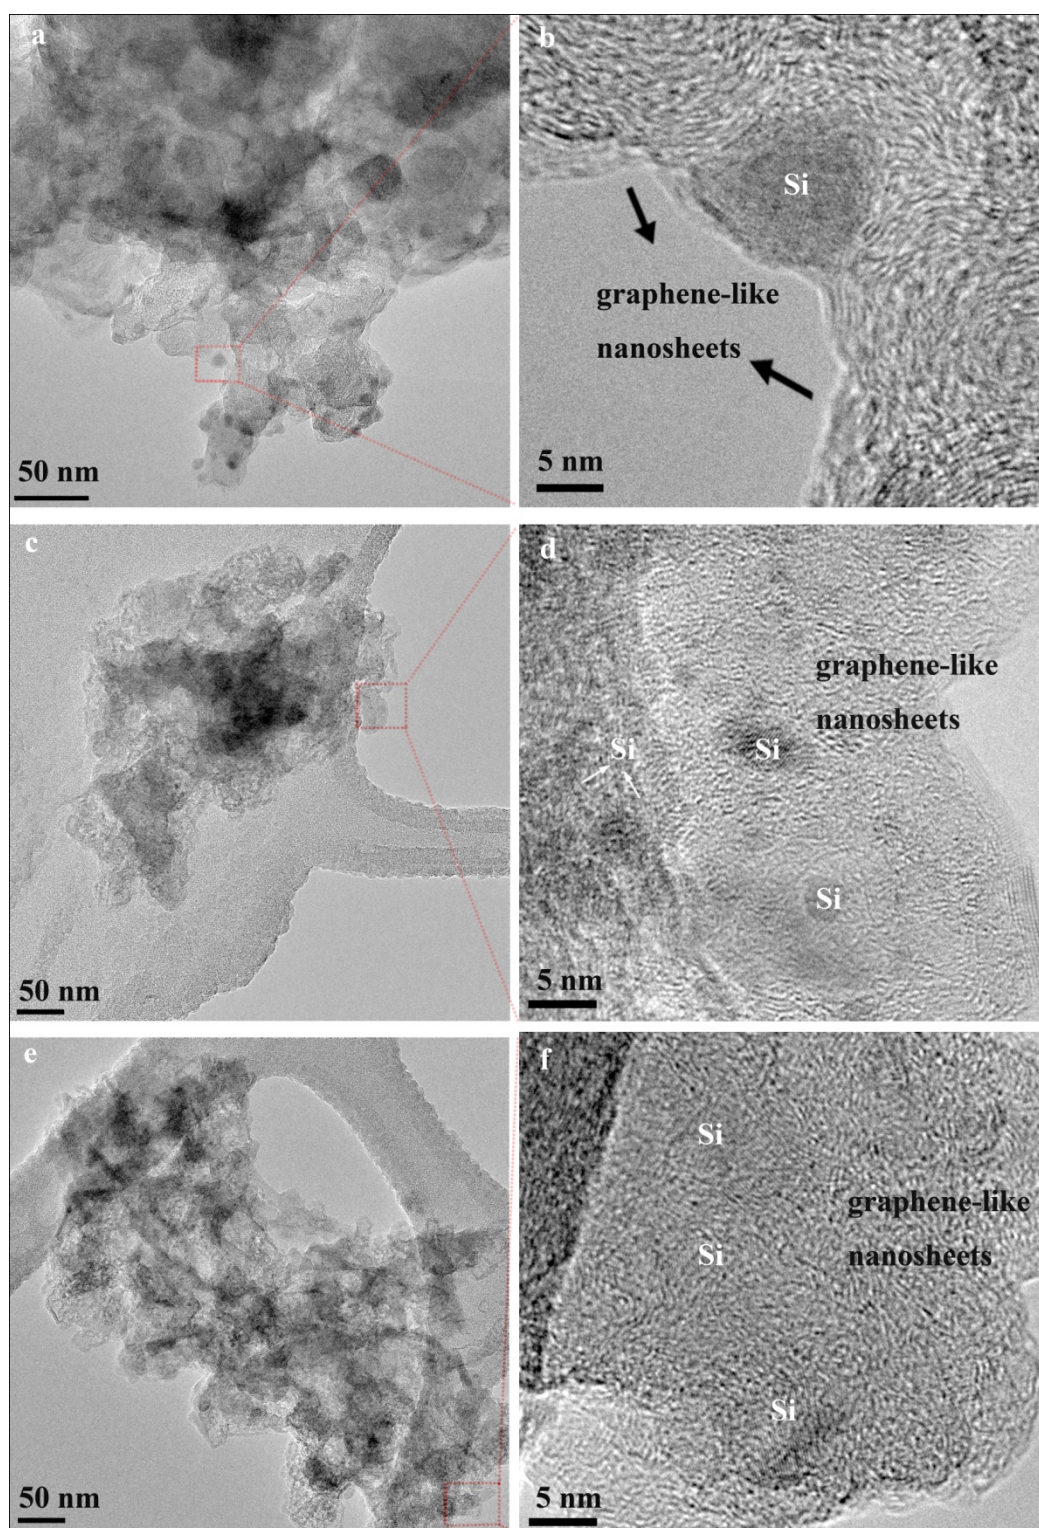

**Fig. S2** TEM images of (a), (b) G-43% Si composite, (c), (d) G-29% Si composite and (e), (f) G-20% Si composite after 50 cycles.
